# Supplementary material for: Genome-wide characterization of soybean RALF genes and their expression responses to Fusarium oxysporum
Source: Front Plant Sci. 2022 Oct 6;13:1006028. doi: 10.3389/fpls.2022.1006028 (PMC9583537; doi:10.3389/fpls.2022.1006028)
Supplement: Supplementary file 6 [file Table_1.xlsx]

## Sheet: qRT-PCR
The qRT-PCR primer sequences of GmRALFs
Gene name	Gene ID	Primer name	Sequence
GmRALF1	Glyma.01G186800	qF	ACCCTCGCTCTGTCACTACTCTTC
		qR	CTCTTCTTCGCTGTCTTCGTCGTAG
GmRALF4	Glyma.03G213000	qF	ATGGCAGAAGGTGAGTTTGGAATGG
		qR	CTAGAGCATGGCACGGTGTTACG
GmRALF5	Glyma.03G236000	qF	CCCTCTTGCTTCTTCTGTCTTCGTC
		qR	ATGTACTTGGTCGTGGCTAAGATGC
GmRALF6	Glyma.05G151400	qF	GATGGAGTCCGAAATAAGCCGAAGG
		qR	CTTCACCAGAGCCACCACCATTAC
GmRALF7	Glyma.05G151900	qF	GCTTCACACCCTTCTCCCAATCTG
		qR	CTCTGAGTCCATTTCTGGCTCTGC
GmRALF9	Glyma.07G247500	qF	TCTGATGGAGTCGGAGAGCAACC
		qR	TCGGGAGCAAGGGACAGTGTTC
GmRALF10	Glyma.08G108100	qF	GAAGTTACCAAGCGCAACATAGCAC
		qR	GCATATCCTGGAGCATCCTCTGTTG
GmRALF11	Glyma.08G108700	qF	CTGCTTCACACCCTTCTCCCAATC
		qR	GCTGCACACCTTCCAGAACTCTC
GmRALF12	Glyma.08G248700	qF	CTCCCACTTCCGCAGAATCCTTG
		qR	GGCACAGTTTCTCGCTCTACCTTC
GmRALF13	Glyma.10G152000	qF	ATGGCGAAGTCGTGTTCCTTAGC
		qR	GAAGCCCATCCCATTCCCAAGTG
GmRALF14	Glyma.11G055200	qF	GCCCACCACAATGTCGCTCTAC
		qR	GTACTTCATCCGCCGCCAGAAC
GmRALF15	Glyma.11G254600	qF	GTTCTACACCTGCAATGGCCTACC
		qR	TCTGTTGGTCTCCGAATCCATCTCC
GmRALF19	Glyma.15G075300	qF	TTCTGAATCAACACGTCGGTCACTG
		qR	CGCATGGGACCTGGTTACTTCTAAG
GmRALF21	Glyma.17G026400	qF	TCTGATGGAGTCGGAGAGCAACC
		qR	TCGGGAGCAAGGGACAGTGTTC
GmRALF22	Glyma.18G002500	qF	TTCCATGATCTCCCTCTGTCTGACC
		qR	GGCTCTGTCAAGCTCAAGCACTC
GmRALF24	Glyma.19G209900	qF	TGGCAGATGGTGAGTTTGGAATGG
		qR	CTAGAGCATGGCACGGTGTTACG
GmRALF25	Glyma.19G233700	qF	CCCTCTTGCTTCTTCTGTCTTCGTC
		qR	ATGTACTTGGTCGTGGCTAAGATGC
GmRALF27	Glyma.20G236400	qF	CACGGTATTGGTGGCGATGAGTC
		qR	TCTCCGAATCCAACTCGTACTCCTC
GmPR1	Glyma.15G062500	qF	GCACCGGTAACCTAAGTGGG
		qR	ATAGTTGCCAGGGGGAGCAT
GmPR10	Glyma.15G145700	qF	CGCCATATGATGGGTGTTGTTACTCAGATT
		qR	ACGCGTCGACATAATCAGGATTTGCCAAAAG

## Sheet: Secretory function
The primer sequence of secretory function analysis
Gene name	Gene ID	Primer name	Sequence
GmRALF4	Glyma.03G213000	GmRALF4-SingnalP-F	cggaattttaattaagaattcATGTCAAGTGTTTCTTTT
		GmRALF4-SingnalP-R	cactatagggagaacctcgagTGCACCCACTATGGAAGG
GmRALF5	Glyma.03G236000	GmRALF5-SingnalP-F	cggaattttaattaagaattcATGGAGTGTCATTGTGTA
		GmRALF5-SingnalP-R	cactatagggagaacctcgagTGATGTTTGCTTGTTTGT
GmRALF10	Glyma.08G108100	GmRALF10-SingnalP-F	cggaattttaattaagaattcATGGAGTCTCAAAAATCT
		GmRALF10-SingnalP-R	cactatagggagaacctcgagCTTGTTTGCCTTTTTAGC
GmRALF24	Glyma.19G209900	GmRALF24-SingnalP-F	cggaattttaattaagaattcATGTCAAGTGTTACTTTT
		GmRALF24-SingnalP-R	cactatagggagaacctcgagTGCACCTACTATGGAAGG
GmRALF25	Glyma.19G233700	GmRALF25-SingnalP-F	cggaattttaattaagaattcATGATATTCCAACAACCT
		GmRALF25-SingnalP-R	cactatagggagaacctcgagTGATGTTTGTTTGTTGAG
RALF1	AT1G02900	RALF1-SingnalP-F	cggaattttaattaagaattcATGGACAAGTCCTTTACT
		RALF1-SingnalP-R	cactatagggagaacctcgagGGCTTGGACCGGAGGTGA

## Sheet: Y2H
Primer sequences for yeast two-hybrid assay
Gene name	Gene ID	Primer name	Sequence
GmFERed	Glyma.18G215800	GmFERed-AD-inF	gccatggaggccagtgaattcAAGGATTTTGAGCCTAAA
		GmFERed-AD-inR	cagctcgagctcgatggatccGGCCTGTATGATTCTTTGA
GmRALF5	Glyma.03G236000	GmRALF5-BD-InF	atggccatggaggccgaattcATGGAGTGTCATTGTGTA
		GmRALF5-BD-InR	ccgctgcaggtcgacggatccGGCTCCTGCACCTGGTGAT
GmRALF25	Glyma.19G233700	GmRALF25-BD-InF	atggccatggaggccgaattcATGATATTCCAACAACCT
		GmRALF25-BD-InR	ccgctgcaggtcgacggatccGGCTCCTGCACCTGGTGAT
GmRALF4	Glyma.03G213000	GmRALF4-BD-InF	atggccatggaggccgaattcATGGGTGAGCACCGGCTAAGG
		GmRALF4-BD-InR	ccgctgcaggtcgacggatccGAGAATTACGGCAACGGGTGAT
GmRALF24	Glyma.19G209900	GmRALF24-BD-InF	atggccatggaggccgaattcATGGGGGAGCACCGGCTAAGG
		GmRALF24-BD-InR	ccgctgcaggtcgacggatccGAGAGTTACGGCAACGAGTGAT
GmRALF10	Glyma.08G108100	GmRALF10-BD-InF	atggccatggaggccgaattcATGGAGTCTCAAAAATCT
		GmRALF10-BD-InR	ccgctgcaggtcgacggatccGTTTTCTGCATTTGCATAT
