# Supplementary material for: Genome-wide characterization of soybean RALF genes and their expression responses to Fusarium oxysporum
Source: Front Plant Sci. 2022 Oct 6;13:1006028. doi: 10.3389/fpls.2022.1006028 (PMC9583537; doi:10.3389/fpls.2022.1006028)
Supplement: Supplementary file 7 [file Table_2.xlsx]

## Sheet: Sheet1
Table S2 The 27 identified GmRALF genes and 34 identified RALF genes in this study
Gene ID	Gene Name	Size (aa)	MW (Da)	pI	instability index	GRAVY	aliphatic index	signal peptide		Gene ID	Gene NameA	Size (aa)	MW (Da)	pI	instability index	GRAVY	aliphatic index	signal peptide
Glyma.01G186800	GmRALF1	174	19.57	8.89	55.44	-0.107	87.99	Yes		AT1G02900	RALF1	120	12.97	8.25	55.71	-0.206	73.25	Yes
Glyma.03G084050	GmRALF2	77	9.16	9.85	46.74	-0.666	73.51	Yes		AT1G23145	RALFL2	97	11.11	9.97	48.56	-0.465	80.41	Yes
Glyma.03G084075	GmRALF3	77	9.06	9.51	34.95	-0.594	71.04	Yes		AT1G23147	RALFL3	90	10.24	9.5	45.39	-0.476	76.89	Yes
Glyma.03G213000	GmRALF4	115	12.75	8.61	64.03	-0.175	70.43	Yes		AT1G28270	RALFL4	110	12.66	9.89	64.94	-0.622	73.64	Yes
Glyma.03G236000	GmRALF5	174	19.73	9.56	57.45	-0.483	65.11	No		AT1G35467	RALFL5	89	10.41	9.63	36.74	-0.211	74.38	Yes
Glyma.05G151400	GmRALF6	119	13.23	8.61	62.49	-0.449	51.68	Yes		AT1G60625	RALFL6	81	9.04	9.42	36.31	-0.294	67.41	Yes
Glyma.05G151900	GmRALF7	128	14.24	8.51	46.12	0.005	95.94	Yes		AT1G60815	RALFL7	81	9.09	9.59	37.94	0.357	78.15	Yes
Glyma.07G198100	GmRALF8	111	12.38	7.74	19.69	-0.438	73.06	Yes		AT1G61563	RALFL8	82	8.91	9.55	21.76	-0.222	82.07	Yes
Glyma.07G247500	GmRALF9	118	12.78	9.08	60.52	-0.011	74.58	Yes		AT1G61566	RALFL9	75	8.26	9.55	12.62	-0.252	83.33	Yes
Glyma.08G108100	GmRALF10	53	6.04	9.91	58.04	-0.981	49.81	No		AT2G19020	RALFL10	73	7.98	9.67	50.34	-0.225	81.51	Yes
Glyma.08G108700	GmRALF11	113	12.58	8.59	36.37	0.079	98.32	Yes		AT2G19030	RALFL11	72	7.88	8.61	54.68	-0.367	74.58	Yes
Glyma.08G248700	GmRALF12	115	12.53	8.81	34.69	0.097	95.83	Yes		AT2G19040	RALFL12	72	7.88	8.7	51.79	-0.403	74.44	Yes
Glyma.10G152000	GmRALF13	117	12.52	9.11	59.38	-0.184	68.55	Yes		AT2G19045	RALFL13	72	7.88	8.61	51.39	-0.4	73.19	Yes
Glyma.11G055200	GmRALF14	121	13.96	8.67	53.52	-0.336	68.68	Yes		AT2G20660	RALFL14	101	11.72	9.42	49.7	-0.386	92.57	Yes
Glyma.11G254600	GmRALF15	122	13.86	8.12	48.31	-0.139	79.92	Yes		AT2G22055	RALFL15	79	8.83	10.04	22.98	-0.356	79.11	Yes
Glyma.12G206100	GmRALF16	74	8.2	9.07	42.09	0.103	101.35	Yes		AT2G32835	RALFL16	95	10.67	7.64	32.98	-0.201	70.84	Yes
Glyma.13G178300	GmRALF17	111	12.51	8.8	21.89	-0.48	73.87	Yes		AT2G32890	RALFL17	77	8.38	4.19	24.06	-0.026	81.04	Yes
Glyma.13G294734	GmRALF18	83	9.07	8.75	47.73	0.022	88.07	Yes		AT2G33130	RALF18	103	11.39	9.3	40.95	-0.256	82.43	Yes
Glyma.15G075300	GmRALF19	124	13.82	7.7	50.4	-0.439	68.63	Yes		AT2G33775	RALFL19	110	12.4	9.77	53.21	-0.459	80.73	Yes
Glyma.16G090600	GmRALF20	72	8.29	8.96	26.78	-0.776	62.36	Yes		AT2G34825	RALFL20	72	7.72	9.1	55.77	-0.275	59.72	Yes
Glyma.17G026400	GmRALF21	120	13.09	8.9	62.52	-0.127	69.17	Yes		AT3G04735	RALFL21	105	11.95	9.8	58.87	-0.29	72.48	No
Glyma.18G002500	GmRALF22	122	13.9	8.13	48.93	-0.164	76.72	Yes		AT3G05490	RALFL22	119	13.03	8.6	53.72	-0.197	72.27	Yes
Glyma.18G175401	GmRALF23	114	12.5	6.94	39.34	-0.139	60.81	Yes		AT3G16570	RALF23	138	15.05	8.88	70.45	-0.264	68.04	Yes
Glyma.19G209900	GmRALF24	115	12.71	9.05	54.2	-0.135	73.83	Yes		AT3G23805	RALFL24	118	12.24	8.32	58.01	-0.252	81.78	Yes
Glyma.19G233700	GmRALF25	129	14.4	8.65	60.12	-0.36	68.99	No		AT3G25165	RALFL25	74	8.52	10.17	56.41	-0.251	94.73	Yes
Glyma.20G066000	GmRALF26	73	8.23	9.56	44.55	-0.236	89.45	Yes		AT3G25170	RALFL26	76	8.61	10.31	54.29	-0.482	78.16	Yes
Glyma.20G236400	GmRALF27	114	12.21	9.04	59.52	-0.126	76.32	Yes		AT3G29780	RALFL27	117	12.7	8.23	48.28	-0.158	70.09	Yes
average value		110.556	12.3452	8.78222	47.993	-0.268111	75.3341			AT4G11510	RALFL28	85	9.39	9.19	49.5	-0.478	56.24	Yes
										AT4G11653	RALFL29	90	10.31	10.05	61.7	-0.128	81.22	Yes
										AT4G13075	RALFL30	76	8.22	8.99	35.86	0.001	80.79	Yes
										AT4G13950	RALFL31	113	12.68	5.01	48.13	-0.177	84.69	Yes
										AT4G14010	RALFL32	100	10.95	6.07	76.74	-0.198	72.2	Yes
										AT4G15800	RALFL33	116	12.81	9.41	63.62	-0.184	76.64	Yes
										AT5G67070	RALFL34	129	14.73	6.28	65.42	-0.467	76.36	Yes
										average value		94.3235	10.4885	8.815	48.4947	-0.272647	76.6288
