# Supplementary material for: Genome-wide characterization of soybean RALF genes and their expression responses to Fusarium oxysporum
Source: Front Plant Sci. 2022 Oct 6;13:1006028. doi: 10.3389/fpls.2022.1006028 (PMC9583537; doi:10.3389/fpls.2022.1006028)
Supplement: Supplementary file 8 [file Table_3.xlsx]

## Sheet: Sheet1
Table S3 Distribution of GmRALFs and RALFs at each Clade
Gene ID	Gene name	Clade
Glyma.03G236000	GmRALF5	I
Glyma.10G152000	GmRALF13
Glyma.18G175401	GmRALF23
Glyma.19G233700	GmRALF25
Glyma.20G236400	GmRALF27
AT1G02900	RALF1
AT3G05490	RALF22
Glyma.03G213000	GmRALF4	II
Glyma.07G247500	GmRALF9
Glyma.17G026400	GmRALF21
Glyma.19G209900	GmRALF24
AT3G16570	RALF23
AT4G15800	RALF33
Glyma.07G198100	GmRALF8	III
Glyma.13G178300	GmRALF17
Glyma.15G075300	GmRALF19
AT1G28270	RALF4
AT2G33775	RALF19
AT2G20660	RALF14	IV
AT2G33130	RALF18
Glyma.03G084050	GmRALF2	V
Glyma.03G084075	GmRALF3
Glyma.08G248700	GmRALF12
Glyma.16G090600	GmRALF20
AT2G32890	RALF17
AT3G29780	RALF27
AT2G19020	RALF10	VI
AT2G19030	RALF11
AT2G19040	RALF12
AT2G19045	RALF13
AT3G25165	RALF25
AT3G25170	RALF26
AT4G13075	RALF30
Glyma.01G186800	GmRALF1	VII
Glyma.11G055200	GmRALF14
AT5G67070	RALF34
AT1G35467	RALF5	VIII
AT4G11653	RALF29
Glyma.12G206100	GmRALF16	IX
Glyma.13G294734	GmRALF18
Glyma.20G066000	GmRALF26
AT1G61563	RALF8
AT1G61566	RALF9
AT2G22055	RALF15
AT1G23145	RALF2	X
AT1G23147	RALF3
AT1G60625	RALF6
AT1G60815	RALF7
AT2G32835	RALF16
AT2G34825	RALF20
AT3G04735	RALF21
AT4G11510	RALF28
Glyma.05G151400	GmRALF6	XI
Glyma.08G108100	GmRALF10
AT4G14010	RALF32
Glyma.05G151900	GmRALF7	XII
Glyma.08G108700	GmRALF11
Glyma.11G254600	GmRALF15
Glyma.18G002500	GmRALF22
AT3G23805	RALF24
AT4G13950	RALF31
