# Supplementary material for: Genome-wide characterization of soybean RALF genes and their expression responses to Fusarium oxysporum
Source: Front Plant Sci. 2022 Oct 6;13:1006028. doi: 10.3389/fpls.2022.1006028 (PMC9583537; doi:10.3389/fpls.2022.1006028)
Supplement: Supplementary file 9 [file Table_4.xlsx]

## Sheet: Sheet1
Table S4 Coding sequences and protein sequences of the identified soybean GmRALF gene members
Gene	Gene ID	Sequence Type	Sequences
GmRALF1	Glyma.01G186800	CDS	ATGACACACAGCTGTAAACCAGCTTTGGCGCATGTGACCCCCTGTCCCCTGTCCCCTGTCCCAACACCCAAAACAACACAACAAATAAAACTCATACCTGTGACCGTGTTGATTAACTTCACACTTCACTCTCTAGTCATGGCTTCTTCTCTTCCTCTTCTCAACCTTCTTACCCTCGCTCTGTCACTACTCTTCTGCATTGCCTTAACTTCCGAGGTTGGCGTGCAGGCGCAGATGGAGGAGACAGGCTTGAACCTCATGTCGGAGGCGTTGGAGTGGCCAACCGCAATGTCGCTCTACGACGAAGACAGCGAAGAAGAGGATGTCCAGAACGGTTACAGTCGGAGATCGTTGTTCTGGCGGAGGATGAAGTACTACATCTCCTACGGCGCTCTTTCC…
		Protein	MTHSCKPALAHVTPCPLSPVPTPKTTQQIKLIPVTVLINFTLHSLVMASSLPLLNLLTLALSLLFCIALTSEVGVQAQMEETGLNLMSEALEWPTAMSLYDEDSEEEDVQNGYSRRSLFWRRMKYYISYGALSANRIPCPPRSGRSYYTHNCYRARGPVHPYSRGCSVITRCRR*
GmRALF2	Glyma.03G084050	CDS	ATGGCACAACCAAATTCCAACATAAAGATTTGGTTCTTTTGTTTTCTTCTTCTTAGCATGGTTGCATTCAACCATGGCAAACTAGATGATCAAGAAAACATACACAACAAAATGTATCAGCTAACCGGGCGCAAACTTTTCAATGAAAATAATGATATAAAACGCATTCCTGCCAACCCTTATAGACGTGGCTGCTCTATAATACATAGATGTCGACATGGAAAACACAACTAA
		Protein	MAQPNSNIKIWFFCFLLLSMVAFNHGKLDDQENIHNKMYQLTGRKLFNENNDIKRIPANPYRRGCSIIHRCRHGKHN*
GmRALF3	Glyma.03G084075	CDS	ATGGCACAACCAAATTCCAACATGAAGATTTGGTTCTTTTGTTTTCTTCTCCTTAGCATGCTTGCATTCAACCATGGCAAACTAGATGATCAAGAAAACATACACAACAACATGTATGCGCTGATCGGACGCAAACTTTTCAATGAAAATAATGACACAAAACCTATTCCTGCCAACCCTTATAGACGTGGCTGCTCTATAATACATAGATGTCGACATGGAAAACACAACTAA
		Protein	MAQPNSNMKIWFFCFLLLSMLAFNHGKLDDQENIHNNMYALIGRKLFNENNDTKPIPANPYRRGCSIIHRCRHGKHN*
GmRALF4	Glyma.03G213000	CDS	ATGTCAAGTGTTTCTTTTCTTTTGGCCTTGTTCATGGTAGTAGCTTTGTCTATCTTTCCTTCCATAGTGGGTGCAATAGGTGAGCACCGGCTAAGGTGGGTGCCTGAGACAACAACACCATGCCAAAGCTCCATAGAAGAGTGCATGGCAGAAGGTGAGTTTGGAATGGATTCAGAGTCCCACCGGCGCATTCTAGCGACCTCACAATATATAAGCTACAAGGCACTTCAACGTAACACCGTGCCATGCTCTAGGAGGGGTGCTTCCTACTACAACTGCAAGCCAGGTGCAGATGCTAATCCTTACACTCGTGGCTGCCCCACCATCACCCGTTGCCGTAATTCTTAG
		Protein	MSSVSFLLALFMVVALSIFPSIVGAIGEHRLRWVPETTTPCQSSIEECMAEGEFGMDSESHRRILATSQYISYKALQRNTVPCSRRGASYYNCKPGADANPYTRGCPTITRCRNS*
GmRALF5	Glyma.03G236000	CDS	ATGGAGTGTCATTGTGTAACGCAGGGGTCTTTTAAAACTTGGTTGCAAATAATGGTGCCGTTATTCTGCAAAACCAAATCAAGAAGGAACAGAGAAAGAGAGAGGAGAGGCATTGTAATCGTGACCTCTCAAGCTTCTTTCAAAGACAGAGAAGAAAGAACAAAACAATCTCAACAAACACAAACAAACAAGCAAACATCAATGGCAAACTCGTATACGTGGCTCTTCCTCGCGATTTCTGCCACCCTCTTGCTTCTTCTGTCTTCGTCGCCGACAGCGGACGCGGGAGCGCTGGGCATGGAAATGACATGGATACCCTCCATGCCCATGGAAGAGGAGTTCCAGCTGGACAGCGAGATCAGCCGGCGCATCTTAGCCACGACCAAGTACATCAGCTAC…
		Protein	MECHCVTQGSFKTWLQIMVPLFCKTKSRRNRERERRGIVIVTSQASFKDREERTKQSQQTQTNKQTSMANSYTWLFLAISATLLLLLSSSPTADAGALGMEMTWIPSMPMEEEFQLDSEISRRILATTKYISYGALQRNTVPCSRRGASYYNCQPGAQANPYSRGCSAITRCRS*
GmRALF6	Glyma.05G151400	CDS	ATGGCCTCAAAATCATCCACCATTAGACTTCTTTGTTTCTGCTACTTCATGCTCTTCAGCTTTATGCATTTCAGCAGCTGCACTGTGTTCTCATTGAAAAGTCATGCAAGCACATGCAATGGTTCCATAGCTGAATGCAATCAAGAAGATGAGCTGTTGATGGAGTCCGAAATAAGCCGAAGGTTTTTGGAGCAGAAGAGATCATACATTTCCAATGGAGCTTTACAGAGAGATAAACCAGTTTGTAATGGTGGTGGCTCTGGTGAAGCTTATAGTAAAACTGGAGGGTGTCTTCCTCCACCCTCAAATCCTCAAAATAGAGGCTGCTCTAAGTATTATCGTTGTAGGTCTGACTCTTGA
		Protein	MASKSSTIRLLCFCYFMLFSFMHFSSCTVFSLKSHASTCNGSIAECNQEDELLMESEISRRFLEQKRSYISNGALQRDKPVCNGGGSGEAYSKTGGCLPPPSNPQNRGCSKYYRCRSDS*
GmRALF7	Glyma.05G151900	CDS	ATGTCCCAACCCAGATTCATTGTCATGGCTTTCCCACGTTTGGCACTTGTTCTTCTGCTTCACACCCTTCTCCCAATCTGCAATGGCCTATTAGTTGTGGACCTCAATTTGAGTGAAACTGCTGTGATGACCAAAAGGGTTTGCACCAAAAGCATTGGAGAGTGTTTGGCAGAGCCAGAAATGGACTCAGAGAGCAATAGGAGAGTTCTGGAAGGTGTGCAGCACATAAAGTACATTAGCTATGAGACACTCAAGAGGGACATGGTTCCATGTGATAGAGCAGGAGCTTCTTACTACAATTGTCATGCAAGACCAGCAAATCCTTATAATAGGGGCTGTGAGGTCATTACTGGATGTGCAAGAGGTGTTCAAGGCATCAAAACTTGA
		Protein	MSQPRFIVMAFPRLALVLLLHTLLPICNGLLVVDLNLSETAVMTKRVCTKSIGECLAEPEMDSESNRRVLEGVQHIKYISYETLKRDMVPCDRAGASYYNCHARPANPYNRGCEVITGCARGVQGIKT*
GmRALF8	Glyma.07G198100	CDS	ATGAACTTCAAACCCTGGCTCTCTTTCCTCCTCTTGGCCCTGGCCTTGGCCATGGTGGCTGAGGCTTCTAGTGTTCATCATGAATATGGCTTTCATGGTGCTGCTGTGGTCCATGATCTCATTGGAGATGACAATGAGATGTTGCTTGATTCAGAGACCAATCGTCGAACGCTCGCTGGCCGGCAACAGTACATTAGCTATGGTGCCCTAAATGCCAACAATGTGCCATGTGGTAACCGTGGAAGATCCTACTACAATTGCCAGCAGAGGGGTCGTGCCAACCCTTACAATCGTGGTTGCACGCAAATCACACATTGTGCTAGAGACACCAGCTAG
		Protein	MNFKPWLSFLLLALALAMVAEASSVHHEYGFHGAAVVHDLIGDDNEMLLDSETNRRTLAGRQQYISYGALNANNVPCGNRGRSYYNCQQRGRANPYNRGCTQITHCARDTS*
GmRALF9	Glyma.07G247500	CDS	ATGGGGAGCTCAACCTTCTGTGCCTTCTTCCTCCTGTGTGCAATCTTGGCCGTCCACGTGGCACAATCCTCATCCTCCACCCTCGACCTGGACGCCTTCTTCCTCCCTCTCAAGTCCGGCTGTCGCGGATCCGTCGCCGAGTGCAGCCTCCTCGCCGGCGACGACGCCGAGTTTCTGATGGAGTCGGAGAGCAACCGGCGCATTCTAGCAGGAAGGAGCTACATAAGCTACGGTGCGCTGAGGAGGAACACTGTCCCTTGCTCCCGACGTGGTGCTTCCTATTACAATTGCCGCCCCGGCGCTCAGGCCAACCCCTACAGCCGCGGATGCAGTGCTATCACCCGATGCAGGCGTTGA
		Protein	MGSSTFCAFFLLCAILAVHVAQSSSSTLDLDAFFLPLKSGCRGSVAECSLLAGDDAEFLMESESNRRILAGRSYISYGALRRNTVPCSRRGASYYNCRPGAQANPYSRGCSAITRCRR*
GmRALF10	Glyma.08G108100	CDS	ATGGAGTCTCAAAAATCTCAAAATCATGCTAAAAAGGCAAACAAGTACATTATTATGGAAGTTACCAAGCGCAACATAGCACCATGTAGCAAAAACTGCCTACCGCCAGCATCAAATCCTTACAACAGAGGATGCTCCAGGATATGCAAATGCAGAAAATGA
		Protein	MESQKSQNHAKKANKYIIMEVTKRNIAPCSKNCLPPASNPYNRGCSRICKCRK*
GmRALF11	Glyma.08G108700	CDS	ATGTCCCAACCCAGATTCATTGTCATGACTTTCCCATGTTTGGCACTTGTTCTTCTGCTTCACACCCTTCTCCCAATCTGCAATGGCCTATCAGTTGTGGACCTCATCAATTTGAAGTGTTTGGCAGAGCCAGAAATGGACTCAGAGAGCAATAGGAGAGTTCTGGAAGGTGTGCAGCACATAAAGTACATTAGCTATGGGACACTGAAGAGGGACATGGTTCCATGTGATAGAGCAGGAGCTTCTTACTACAATTTTCATGCAAGACCAGCTAATCCTTATAATAGGGGCTGTGAGGTCATTACTGGATGTGCAAGAGGTGTTCAAGGCATCAAAACTTGA
		Protein	MSQPRFIVMTFPCLALVLLLHTLLPICNGLSVVDLINLKCLAEPEMDSESNRRVLEGVQHIKYISYGTLKRDMVPCDRAGASYYNFHARPANPYNRGCEVITGCARGVQGIKT*
GmRALF12	Glyma.08G248700	CDS	ATGAAGAAGCAAGCATCAAGCACTTTCCTGATGTGGGTTATGGTGATATCGCTTCACGCACATCTCATCATTGCAGCTGTGTCTAAGTCTAATGGCACAATTTCCGTGTGCGATGGCTCCGTAGAGGACTGCCTCAACGTCGTCCACTTGGACTCAGAGCTTCTTCCCACCATCTCCAGCTCCCACTTCCGCAGAATCCTTGCTGGAAAATATGATGGAGTTACCAACGATGCACTAATTCCTGATAAACCCTTCAAGGGATGTAAAATCGGAGAAGCTTATCGTAGCTGTCTGGCCCAAGTTGAAGGTAGAGCGAGAAACTGTGCCATCTACAAGAGGGGTTGCTAA
		Protein	MKKQASSTFLMWVMVISLHAHLIIAAVSKSNGTISVCDGSVEDCLNVVHLDSELLPTISSSHFRRILAGKYDGVTNDALIPDKPFKGCKIGEAYRSCLAQVEGRARNCAIYKRGC*
GmRALF13	Glyma.10G152000	CDS	ATGGCGAAGTCGTGTTCCTTAGCTATGATGTTGATCTCCGCCGCCACCGTATTGGTGGCGATGAGTCGGTGGCCGACAGCCGTGGGCGGTGGCGGGGACCACCACTTGGGAATGGGATGGGCTTCCACGTGCAAAGGATCCATTGCTGAGTGCCTGGGAGGGGAAGAGTACGAATTGGACTCGGAGATCAACCGGCGCATCTTAGCCACCAACAAGTACATCAGCTACGGTGCGCTGCAGAGGAACACTGTCCCCTGCTCTCGCCGCGGCGCTTCCTACTACAATTGCAGACCCGGGGCCCAGGCCAACCCTTACAGCCGCGGTTGCAGCGCCATTACGAGGTGCAGAAGCTGA
		Protein	MAKSCSLAMMLISAATVLVAMSRWPTAVGGGGDHHLGMGWASTCKGSIAECLGGEEYELDSEINRRILATNKYISYGALQRNTVPCSRRGASYYNCRPGAQANPYSRGCSAITRCRS*
GmRALF14	Glyma.11G055200	CDS	ATGGCTTCTCTTCTCACCCTCGCTCTGTTACTCTTCTGCATTGCCTTTACCTCCCACGTTGCCGTGCAGGCGCACATGGAGGACACGGCCTTCAACCTCATGTCGGACGCCTTGGAGTGGCCCACCACAATGTCGCTCTACGACGAAGACGACGCCCAAGAGGATGTCGAGAACGCTTACAGTCGGAGATCGTTGTTCTGGCGGCGGATGAAGTACTACATCTCCTACGGTGCTCTTTCTGCTAACCGAATTCCTTGCCCGCCTCGTTCTGGTAGATCTTACTACACCCACAACTGCTACAGGGCACGAGGCCCCGTTCACCCTTACTCCAGAGGATGCTCTGCCATCACGCGCTGCCGGAGATGA
		Protein	MASLLTLALLLFCIAFTSHVAVQAHMEDTAFNLMSDALEWPTTMSLYDEDDAQEDVENAYSRRSLFWRRMKYYISYGALSANRIPCPPRSGRSYYTHNCYRARGPVHPYSRGCSAITRCRR*
GmRALF15	Glyma.11G254600	CDS	ATGTCCCAACCCAGATTCATTTCCATGATCTCCCTCTGTCTGGCCCTTGTTCTGTTCTACACCTGCAATGGCCTACCATTTGTGGACCTCAATTTCCATGAAGTAGATGTGATGACCAAAAGGGTTTGCACCAAGAGCATTGGGGAGTGCCTGAGCTTGACAGAGCCGGAGATGGATTCGGAGACCAACAGAAGAGTTCTGGCAATGCAGAAAAAGTACATTAGCTATGACACACTCAAGAGAGACATGGTTCCCTGTGATAGGGCTGGAGCTTCTTACTACAATTGTCATGCAATACGAGCAAATCCTTATAATAGAGGTTGTGAGGTAATTACTGCTTGTGCAAGAGGTCAAGACATCAAAACTTGA
		Protein	MSQPRFISMISLCLALVLFYTCNGLPFVDLNFHEVDVMTKRVCTKSIGECLSLTEPEMDSETNRRVLAMQKKYISYDTLKRDMVPCDRAGASYYNCHAIRANPYNRGCEVITACARGQDIKT*
GmRALF16	Glyma.12G206100	CDS	ATGGCAATGACAAGGGTGATGCAGGGTCTTGTTCTCTGCACACTTTTGTTGTCGGCGGTTTTGGTCCAAGAAGTTGAGGCAAGAGTAATCAGCAAAGAAGCAATGCAGCGTAACACCATTCCTGGATGCAGCAAAGTACACCCCAATGTCGCCGCTTGTCATCTGCCATTAGTTAACATCAACTATAGAAGAGGTTGTGAGCCAGGAGAAAGATGTCGCCAATAA
		Protein	MAMTRVMQGLVLCTLLLSAVLVQEVEARVISKEAMQRNTIPGCSKVHPNVAACHLPLVNINYRRGCEPGERCRQ*
GmRALF17	Glyma.13G178300	CDS	ATGAACTTCAAACCCTGGCTCTCTTTCCTCCTCTTGGCCCTGGCCCTGGCCATGGTGGCTGAGGCTTCTAGTGTTCATCATGAATATGGCTTCCATGTTAATGCTGTGGTCCATGATCTCATTGGAGATGACAATGAGATGTTGCTAGATTCCGAATCCAATCGCCGAACCCTCACCGGGCGACAACGGTACATTAGCTATGGTGCCCTAAATGCCAACAATGTGCCATGTGGTAACCGTGGAAGATCCTACTACAATTGCCAGCAGAGGGGTCGTGCCAACCCTTACAATCGTGGTTGCACCAAAATCACACATTGTGCTAGAGACACCAGCTAG
		Protein	MNFKPWLSFLLLALALAMVAEASSVHHEYGFHVNAVVHDLIGDDNEMLLDSESNRRTLTGRQRYISYGALNANNVPCGNRGRSYYNCQQRGRANPYNRGCTKITHCARDTS*
GmRALF18	Glyma.13G294734	CDS	ATGGCAATTATGTCAAAGGTGGTGATGGGTCTTGTTCTCTGCGTTCTTTTGGTGTCCGCGGTTTTGGTCCAAGATGCTGAGGCATCAATGGTAGGCCATGGAGCAATGCAGCGTGACACTTTTCCTGGATGCAGCAAAAGACACCCCAGTAATGTGGCCTGTCATCTGCCAATAGCTAATGATTATAGAAGAGATTGTGAGCCAGGACAAAGATGTCGTCATCAAGAAGCTCCAAAGGTGATAGCAAGATAA
		Protein	MAIMSKVVMGLVLCVLLVSAVLVQDAEASMVGHGAMQRDTFPGCSKRHPSNVACHLPIANDYRRDCEPGQRCRHQEAPKVIAR*
GmRALF19	Glyma.15G075300	CDS	ATGAGTTCCAAAGCGTGGCTTGCGTTCCTTCTCCTGGCACTGGCCATGGTCGCTGAAACATATGCCACAATAGATGAATTTGCAACTACGTTAGAAGAATTTGACCCTATTATCTCTGATGGTGATGCTGATCTCATTGTAGATGACAATGAGTTTTTGATGAGTTCTGAATCAACACGTCGGTCACTGATGCATGGTCATCCTGGCAAAGGCAGAGGCAGAGCTAGGTATATCAGCTATGCAGCCCTTAGAAGTAACCAGGTCCCATGCGGTAGGCGTGGACGTTCCTACTACAATTGCAACCAAAGGGGTAGGGCAAACCCTTACAATCGTGGTTGCACTGCCATCACACATTGTGCCAGAGACACAAGTTAG
		Protein	MSSKAWLAFLLLALAMVAETYATIDEFATTLEEFDPIISDGDADLIVDDNEFLMSSESTRRSLMHGHPGKGRGRARYISYAALRSNQVPCGRRGRSYYNCNQRGRANPYNRGCTAITHCARDTS*
GmRALF20	Glyma.16G090600	CDS	ATGGCACAGCCAAATTCCAACATGAAGGTTTGGTTCTTTTGCTTTCTTCTTCTTAGCATGACTGCAATCAACCATGGCAAACTAGACGATAAAAACATACAAAAAGAAATGCATGGGCCGAGCGAGCGTAAACTTTCCGATCAGAATAATGACAAACCTGTTGCTGCCAACCCCTACAATCGTGGCTGCTCCATAATACATAGATGCCGAAATGATTAA
		Protein	MAQPNSNMKVWFFCFLLLSMTAINHGKLDDKNIQKEMHGPSERKLSDQNNDKPVAANPYNRGCSIIHRCRND*
GmRALF21	Glyma.17G026400	CDS	ATGGGGAGCTCCACAACCTTCTGTGCCTTCTTCCTCGTGTGTACGATCTTGTCCGTCCACGTGGCGCAATCCTCATCCTCCACCCTCGACCTGGACACCTTTTTCCTCCCTCTCAAATCCGGCTGCCGCGGATCCGTCGCCGAGTGCAGCCTCCTCGCCGGCGACGACGACACCGAGTTTCTGATGGAGTCGGAGAGCAACCGGCGCATTCTAGCAGGAAGGAGCTACATAAGCTACGGTGCGCTGAGAAGGAACACTGTCCCTTGCTCCCGACGTGGCGCCTCCTACTACAATTGCCGCCCTGGCGCTCAGGCCAACCCCTACAGCCGTGGATGCAGTGCTATCACCCGATGCAGGCGTTGA
		Protein	MGSSTTFCAFFLVCTILSVHVAQSSSSTLDLDTFFLPLKSGCRGSVAECSLLAGDDDTEFLMESESNRRILAGRSYISYGALRRNTVPCSRRGASYYNCRPGAQANPYSRGCSAITRCRR*
GmRALF22	Glyma.18G002500	CDS	ATGTCCCAACCCAGATTCATTTCCATGATCTCCCTCTGTCTGACCCTTTTTCTGTTCCACACTTGCACTGGCCTACCATTTGTGGACCTCAATTTCCATGAAGTGGATGTTATGACCAAAAGGGTTTGCACCAAGAGCATTGGGGAGTGCTTGAGCTTGACAGAGCCGGAGATGGATTCGGAGACCAACAGAAGAGTTCTGGCAATGCAGAAAAAGTACATTAGCTATGACACACTCAAGAGAGACATGGTTCCCTGTGATAGGGCTGGAGCTTCTTACTACAATTGTCATGCAATACGAGCAAATCCTTATAATAGAGGCTGTGAGGTAATTACTGCTTGTGCAAGAGGTCAAGACATCAAAACTTGA
		Protein	MSQPRFISMISLCLTLFLFHTCTGLPFVDLNFHEVDVMTKRVCTKSIGECLSLTEPEMDSETNRRVLAMQKKYISYDTLKRDMVPCDRAGASYYNCHAIRANPYNRGCEVITACARGQDIKT*
GmRALF23	Glyma.18G175401	CDS	ATGGCTCAGTCATATTCGTGGCTCTTCCTGGCGACTTGTGCCACCCTCTTCCTTCTGATTTCGTCGGCGACAACAGCGGACGCAGGAGGAGCAGGAACAGCACCAGGGATGGAAATGACGTGGATGCCCTCCATCTCCATGGAAGGAGCTGAAGAAGAGTTCATGTTGGACAACGAGATCAACCGGCGCATGTTAGCGAGCACAAGGTACATAAGCTACTGTGCGATCCATAGGGGCAGTGTCCCCTGTTCTCACCGCGGAGCCTCCTACTACCATTGCCAACCTGGCGCTCAGGCCAACCCTTACCATCGTGGCTGCAGTGCCATTACAAGGTGCAGGCACTAA
		Protein	MAQSYSWLFLATCATLFLLISSATTADAGGAGTAPGMEMTWMPSISMEGAEEEFMLDNEINRRMLASTRYISYCAIHRGSVPCSHRGASYYHCQPGAQANPYHRGCSAITRCRH*
GmRALF24	Glyma.19G209900	CDS	ATGTCAAGTGTTACTTTTCTCCTGGCCTTGATCATGGTAGTAGCTTTGTCTATGTTTCCTTCCATAGTAGGTGCAATAGGGGAGCACCGGCTAAGGTGGGTGCTTAAGACAACAACACCATGCCAAGGCTCCATAGAAGAGTGCATGGCAGATGGTGAGTTTGGAATGGACTCAGAGTCTCACCGGCGCATTCTAGCAACCTCGCAGTATATAAGCTACAAGGCGCTGCAACGTAACACCGTGCCATGCTCTAGGAGGGGTGCTTCCTACTACAACTGCAAGCCAGGTGCAGATGCTAATCCTTACACTCGTGGCTGCCCCACCATCACTCGTTGCCGTAACTCTTAG
		Protein	MSSVTFLLALIMVVALSMFPSIVGAIGEHRLRWVLKTTTPCQGSIEECMADGEFGMDSESHRRILATSQYISYKALQRNTVPCSRRGASYYNCKPGADANPYTRGCPTITRCRNS*
GmRALF25	Glyma.19G233700	CDS	ATGATATTCCAACAACCTTCAAAGACAGAGAAGAAAGAAGAAAACAACCTCAACAAACAAACATCAATGGCAAACACGTATTCGTGGCTCTTCCTCGCGATTTGTGCCACCCTCTTGCTTCTTCTGTCTTCGTCGCCGACAGCGGACGCGGGAGCGCTGGGCATGGAAATGACATGGATACCCTCCATGCCCATGGAAGAGGAGTTCCAGCTGGACAGCGAGATCAGCCGGCGCATCTTAGCCACGACCAAGTACATCAGCTACGGTGCGCTGCAGAGGAACACTGTCCCCTGCTCTCGCCGCGGAGCCTCCTACTACAATTGCCAGCCTGGCGCCCAGGCCAACCCTTACAGCCGTGGCTGCAGTGCCATCACCAGGTGCAGGAGCTAA
		Protein	MIFQQPSKTEKKEENNLNKQTSMANTYSWLFLAICATLLLLLSSSPTADAGALGMEMTWIPSMPMEEEFQLDSEISRRILATTKYISYGALQRNTVPCSRRGASYYNCQPGAQANPYSRGCSAITRCRS*
GmRALF26	Glyma.20G066000	CDS	ATGGCAATGCCAAAGGGAATGTTGGTTTTGTTGGTTAGCACTCTTCTGGTTTGCTCACTTTTGGGACAACATGCCGAAGCACGTCCAGTTCAAATTGATTATGGGGTAATTAGACGTGACACTATCGTTGGATGCAGCAAAAGACATCCTGCAAATTGCAAACTACCTAGAGCCAATCCATGGAGAAGAGGCTGCGAGGATGAAACTCGATGTCGCCACTGA
		Protein	MAMPKGMLVLLVSTLLVCSLLGQHAEARPVQIDYGVIRRDTIVGCSKRHPANCKLPRANPWRRGCEDETRCRH*
GmRALF27	Glyma.20G236400	CDS	ATGGCCAAGTCATCTTCCTTAGCTATCACGTTGATCTGCGCCGCCACGGTATTGGTGGCGATGAGTCGGTGGCCGACAGCCGTGGGCGGCGGGGACCACCACTTGGGAATGGGATGGGTTTCCAGCACGTGCAAGGGGACCATTGCTGAGTGCCTGGGAGGGGAGGAGTACGAGTTGGATTCGGAGATCAACCGGCGCATCTTAGCCACCAACAAGTACATCAGCTACGTTGCGCTGCAGAGGAACACTGCTCCCTGCTCTCGCCGCGGCGCCTCCTACTACAATTGCCGACCCGGAGCACAGGCCAATCCTTACAGCCGTGGCTGCAGCGCCATTACGAGGTAG
		Protein	MAKSSSLAITLICAATVLVAMSRWPTAVGGGDHHLGMGWVSSTCKGTIAECLGGEEYELDSEINRRILATNKYISYVALQRNTAPCSRRGASYYNCRPGAQANPYSRGCSAITR*
