# Supplementary material for: Genome-wide characterization of soybean RALF genes and their expression responses to Fusarium oxysporum
Source: Front Plant Sci. 2022 Oct 6;13:1006028. doi: 10.3389/fpls.2022.1006028 (PMC9583537; doi:10.3389/fpls.2022.1006028)
Supplement: Supplementary file 10 [file Table_5.xlsx]

## Sheet: Sheet1
Table S5 Analyses the motifs of GmRALF proteins from the MEME website
Motif	E-value	Sites	Width	Best possible match
1	2.9E-566	58	21	C P R A P A N P Y S R G C S K I T R C R R
2	1.6E-322	21	29	L A T T K Y I S Y G A L R R N T V P C S R R G A S Y Y N C
3	2.25e-146	25	15	D E E E F E M D S E I N R R I
4	7.7E-073	6	29	LV M Q K K Y I S Y E T L K R D M V P C D R A G A S Y Y N
5	6.9E-048	6	28	R N Y L E Y G V I N K C A G P N P P P G C N P P G A E Q
6	6.5E-044	57	11	M K A L L I C L L L I
