# Supplementary material for: Genome-wide characterization of soybean RALF genes and their expression responses to Fusarium oxysporum
Source: Front Plant Sci. 2022 Oct 6;13:1006028. doi: 10.3389/fpls.2022.1006028 (PMC9583537; doi:10.3389/fpls.2022.1006028)
Supplement: Supplementary file 11 [file Table_6.xlsx]

## Sheet: Gene location information
The chromosome positions of GmRALFs
Gene name	Gene ID	Starting postion (bp)	Ending postion (bp)	Chromosome position
RALF1	AT1G02900	653976	654338	Chr1
RALF2	AT1G23145	8203962	8204255	Chr1
RALF3	AT1G23147	8205934	8206206	Chr1
RALF4	AT1G28270	9883165	9883497	Chr1
RALF5	AT1G35467	13049164	13049433	Chr1
RALF6	AT1G60625	22333916	22334161	Chr1
RALF7	AT1G60815	22392729	22392974	Chr1
RALF8	AT1G61563	22715081	22715329	Chr1
RALF9	AT1G61566	22717265	22717492	Chr1
RALF10	AT2G19020	8246220	8246441	Chr2
RALF11	AT2G19030	8247783	8248001	Chr2
RALF12	AT2G19040	8249923	8250141	Chr2
RALF13	AT2G19045	8251674	8251892	Chr2
RALF14	AT2G20660	8909467	8909772	Chr2
RALF15	AT2G22055	9379578	9379817	Chr2
RALF16	AT2G32835	13931166	13931453	Chr2
RALF17	AT2G32890	13953058	13953291	Chr2
RALF18	AT2G33130	14046521	14046832	Chr2
RALF19	AT2G33775	14288546	14288878	Chr2
RALF20	AT2G34825	14691411	14691629	Chr2
RALF21	AT3G04735	1292408	1292725	Chr3
RALF22	AT3G05490	1591381	1591740	Chr3
RALF23	AT3G16570	5644748	5645164	Chr3
RALF24	AT3G23805	8586467	8586823	Chr3
RALF25	AT3G25165	9163602	9163826	Chr3
RALF26	AT3G25170	9165975	9166205	Chr3
RALF27	AT3G29780	11671741	11672094	Chr3
RALF28	AT4G11510	6984051	6984308	Chr4
RALF29	AT4G11653	7037086	7037358	Chr4
RALF30	AT4G13075	7624884	7625114	Chr4
RALF31	AT4G13950	8058268	8058609	Chr4
RALF32	AT4G14010	8093010	8093363	Chr4
RALF33	AT4G15800	8984915	8985265	Chr4
RALF34	AT5G67070	26768120	26768509	Chr5
GmRALF1	Glyma.01G186800	53320596	53322642	Gm01
GmRALF2	Glyma.03G084050	24875291	24876873	Gm03
GmRALF3	Glyma.03G084075	24891946	24893544	Gm03
GmRALF4	Glyma.03G213000	43015760	43016965	Gm03
GmRALF5	Glyma.03G236000	44763600	44766266	Gm03
GmRALF6	Glyma.05G151400	34552181	34553959	Gm05
GmRALF7	Glyma.05G151900	34581723	34583983	Gm05
GmRALF8	Glyma.07G198100	37001733	37003616	Gm07
GmRALF9	Glyma.07G247500	42942362	42944111	Gm07
GmRALF10	Glyma.08G108100	8315140	8316301	Gm08
GmRALF11	Glyma.08G108700	8343577	8344965	Gm08
GmRALF12	Glyma.08G248700	21729915	21730591	Gm08
GmRALF13	Glyma.10G152000	38831269	38837797	Gm10
GmRALF14	Glyma.11G055200	4155374	4157215	Gm11
GmRALF15	Glyma.11G254600	39371095	39372816	Gm11
GmRALF16	Glyma.12G206100	38093311	38093849	Gm12
GmRALF17	Glyma.13G178300	28628484	28629271	Gm13
GmRALF18	Glyma.13G294734	38787694	38789700	Gm13
GmRALF19	Glyma.15G075300	5760661	5762497	Gm15
GmRALF20	Glyma.16G090600	13445929	13447518	Gm16
GmRALF21	Glyma.17G026400	1939974	1940929	Gm17
GmRALF22	Glyma.18G002500	222298	223868	Gm18
GmRALF23	Glyma.18G175401	41987222	41988782	Gm18
GmRALF24	Glyma.19G209900	46957296	46958990	Gm19
GmRALF25	Glyma.19G233700	48866129	48866842	Gm19
GmRALF26	Glyma.20G066000	23275507	23277460	Gm20
GmRALF27	Glyma.20G236400	46811815	46812741	Gm20

## Sheet:  Chromosome length information 
Chromosome length information of soybean and Arabidopsis
Species	Chromosome	Chromosome length
Arabidopsis	Chr1	30427671
	Chr2	19698289
	Chr3	23459830
	Chr4	18585056
	Chr5	26975502
Soybean	Gm01	57932355
	Gm03	46951866
	Gm05	42274530
	Gm07	44949256
	Gm08	47227184
	Gm10	51638687
	Gm11	39643745
	Gm12	41531199
	Gm13	45225048
	Gm15	53754295
	Gm16	38112070
	Gm17	41740656
	Gm18	58286270
	Gm19	51272880
	Gm20	47846026
