# Supplementary material for: Genome-wide characterization of soybean RALF genes and their expression responses to Fusarium oxysporum
Source: Front Plant Sci. 2022 Oct 6;13:1006028. doi: 10.3389/fpls.2022.1006028 (PMC9583537; doi:10.3389/fpls.2022.1006028)
Supplement: Supplementary file 12 [file Table_7.xlsx]

## Sheet: Sheet1
Table S7 The analysis of RALFs duplication events
Query gene	Subject gene	identity (%)	Alignment length	Mismatches	Gap openings	Q. start	Q. end	S. start	S. end	E-value	bit score	bit score
AtRALF6	AtRALF7	85.54	242	35	0	5	246	5	246	4e-55	202	246
AtRALF8	AtRALF9	94.06	202	9	1	1	202	1	199	6e-85	301	249
AtRALF8	AtRALF15	86.32	234	29	1	1	234	1	231	3e-56	206	249
AtRALF9	AtRALF15	89.95	199	20	0	1	199	1	199	3e-65	236	240
AtRALF10	AtRALF13	87.2	211	24	1	1	211	1	208	1e-54	200	222
AtRALF10	AtRALF11	86.49	222	27	1	1	222	1	219	6e-54	198	222
AtRALF10	AtRALF12	85.59	222	29	1	1	222	1	219	3e-49	182	222
AtRALF11	AtRALF13	97.17	212	6	0	1	212	1	212	2e-106	373	219
AtRALF11	AtRALF12	95.43	219	10	0	1	219	1	219	4e-101	355	219
AtRALF12	AtRALF13	93.4	212	14	0	1	212	1	212	1e-79	283	219
GmRALF2	GmRALF3	94.44	234	13	0	1	234	1	234	7e-103	361	234
GmRALF3	GmRALF20	82.55	212	31	2	1	212	1	206	5e-30	119	234
GmRALF4	GmRALF24	94.25	348	20	0	1	348	1	348	5e-154	531	348
GmRALF7	GmRALF15	83.54	316	37	4	78	387	63	369	2e-55	204	387
GmRALF8	GmRALF17	94.64	336	18	0	1	336	1	336	1e-151	523	336
GmRALF9	GmRALF21	94.86	350	15	1	11	357	14	363	9e-159	547	363
GmRALF13	GmRALF27	91.33	346	24	2	1	343	1	343	1e-126	440	354
GmRALF15	GmRALF22	97.56	369	9	0	1	369	1	369	0	660	369
