# Supplementary material for: Genome-wide characterization of soybean RALF genes and their expression responses to Fusarium oxysporum
Source: Front Plant Sci. 2022 Oct 6;13:1006028. doi: 10.3389/fpls.2022.1006028 (PMC9583537; doi:10.3389/fpls.2022.1006028)
Supplement: Supplementary file 13 [file Table_8.xlsx]

## Sheet: Sheet1
Table S8 One-to-one orthologous relationships of the GmRALFs and of the RALFs
Seq_1	Seq_2	Ka	Ks	Ka/Ks	EffectiveLen	AverageS-sites	AverageN-sites	cN	cS	pN	pS
AtRALF6	AtRALF7	0.169985	0.147325	1.15381	243	52.3333	190.667	29	7	0.152098	0.133758
AtRALF8	AtRALF9	0.0897978	0.132097	0.679786	225	53.6667	171.333	14.5	6.5	0.0846303	0.121118
AtRALF8	AtRALF15	0.137364	0.209998	0.654121	237	56.4167	180.583	22.6667	10.3333	0.125519	0.183161
AtRALF9	AtRALF15	0.12595	0.194633	0.647112	225	52.5	172.5	20	9	0.115942	0.171429
AtRALF10	AtRALF13	0.11205	0.218933	0.511801	216	52.6667	163.333	17	10	0.104082	0.189873
AtRALF10	AtRALF11	0.112421	0.216546	0.519157	216	53.1667	162.833	17	10	0.104401	0.188088
AtRALF10	AtRALF12	0.126898	0.216153	0.587076	216	53.25	162.75	19	10	0.116743	0.187793
AtRALF11	AtRALF13	0.0122327	0.127515	0.0959315	216	51.1667	164.833	2	6	0.0121335	0.117264
AtRALF11	AtRALF12	0.0247573	0.12595	0.196565	216	51.75	164.25	4	6	0.0243531	0.115942
AtRALF12	AtRALF13	0.0246809	0.280688	0.0879301	216	51.25	164.75	4	12	0.0242792	0.234146
GmRALF2	GmRALF3	0.044706	0.115613	0.386686	231	46.6667	184.333	8	5	0.0433996	0.107143
GmRALF3	GmRALF20	0.150422	0.325186	0.462574	216	43.5833	172.417	23.5	11.5	0.136298	0.263862
GmRALF4	GmRALF24	0.0275984	0.167358	0.164907	345	86.6667	258.333	7	13	0.0270968	0.15
GmRALF7	GmRALF15	0.129572	0.443819	0.291948	360	84.0833	275.917	32.8333	28.1667	0.118997	0.334985
GmRALF8	GmRALF17	0.0282576	0.150675	0.18754	333	80.5833	252.417	7	11	0.0277319	0.136505
GmRALF9	GmRALF21	0.0193747	0.142297	0.136156	354	92.5833	261.417	5	12	0.0191266	0.129613
GmRALF13	GmRALF27	0.0404411	0.248833	0.162523	339	85	254	10	18	0.0393701	0.211765
GmRALF15	GmRALF22	0.0143459	0.0616363	0.232751	366	84.5	281.5	4	5	0.0142096	0.0591716
