# Supplementary material for: Genome-wide characterization of soybean RALF genes and their expression responses to Fusarium oxysporum
Source: Front Plant Sci. 2022 Oct 6;13:1006028. doi: 10.3389/fpls.2022.1006028 (PMC9583537; doi:10.3389/fpls.2022.1006028)
Supplement: Supplementary file 14 [file Table_9.xlsx]

## Sheet: Sheet1
Table S9 Cis-element analysis of the GmRALF gene promoter regions
Gene name	Gene ID	Cis-element name	Cis-element seqence	Starting postion (bp)	Ending postion (bp)	Predicted Cis-element
GmRALF1	Glyma.01G186800	ABRE	CGTACGTGCA	170	179	cis-acting element involved in the abscisic acid responsiveness
		ARE	AAACCA	1141	1147	cis-acting regulatory element essential for the anaerobic induction
		P-box	CCTTTTG	98	105	gibberellin-responsive element
		MBS	CAACTG	1766	1772	MYB binding site involved in drought-inducibility
		CCAAT-box	CAACGG	904	910	MYBHv1 binding site
GmRALF2	Glyma.03G084050	TGA-element	AACGAC	630	636	auxin-responsive element
		TC-rich repeats	ATTCTCTAAC	995	1004	cis-acting element involved in defense and stress responsiveness
		TC-rich repeats	GTTTTCTTAC	1592	1601	cis-acting element involved in defense and stress responsiveness
		ARE	AAACCA	1774	1780	cis-acting regulatory element essential for the anaerobic induction
		CCAAT-box	CAACGG	462	468	MYBHv1 binding site
		CCAAT-box	CAACGG	581	587	MYBHv1 binding site
		CCAAT-box	CAACGG	640	646	MYBHv1 binding site
		WUN-motif	AAATTTCCT	1163	1172	wound-responsive element
GmRALF3	Glyma.03G084075	ARE	AAACCA	1778	1784	cis-acting regulatory element essential for the anaerobic induction
		ARE	AAACCA	1895	1901	cis-acting regulatory element essential for the anaerobic induction
		MRE	AACCTAA	1056	1063	MYB binding site involved in light responsiveness
GmRALF4	Glyma.03G213000	LTR	CCGAAA	223	229	cis-acting element involved in low-temperature responsiveness
		TCA-element	TCAGAAGAGG	1329	1338	cis-acting element involved in salicylic acid responsiveness
		ABRE	ACGTG	1051	1056	cis-acting element involved in the abscisic acid responsiveness
		ABRE	ACGTG	1059	1064	cis-acting element involved in the abscisic acid responsiveness
		GC-motif	CCCCCG	373	379	enhancer-like element involved in anoxic specific inducibility
		MBS	CAACTG	1260	1266	MYB binding site involved in drought-inducibility
		CCAAT-box	CAACGG	1361	1367	MYBHv1 binding site
GmRALF5	Glyma.03G236000	ABRE	ACGTG	245	250	cis-acting element involved in the abscisic acid responsiveness
		ABRE	ACGTG	259	264	cis-acting element involved in the abscisic acid responsiveness
GmRALF6	Glyma.05G151400	LTR	CCGAAA	912	918	cis-acting element involved in low-temperature responsiveness
		ABRE	CGTACGTGCA	500	509	cis-acting element involved in the abscisic acid responsiveness
		ABRE	ACGTG	503	508	cis-acting element involved in the abscisic acid responsiveness
		ABRE	ACGTG	1337	1342	cis-acting element involved in the abscisic acid responsiveness
		ARE	AAACCA	1595	1601	cis-acting regulatory element essential for the anaerobic induction
		AuxRR-core	GGTCCAT	475	482	cis-acting regulatory element involved in auxin responsiveness
		AuxRR-core	GGTCCAT	950	957	cis-acting regulatory element involved in auxin responsiveness
		TGACG-motif	TGACG	1340	1345	cis-acting regulatory element involved in the MeJA-responsiveness
		CAT-box	GCCACT	754	760	cis-acting regulatory element related to meristem expression
		MBS	CAACTG	936	942	MYB binding site involved in drought-inducibility
		MRE	AACCTAA	1726	1733	MYB binding site involved in light responsiveness
GmRALF7	Glyma.05G151900	LTR	CCGAAA	164	170	cis-acting element involved in low-temperature responsiveness
		ABRE	ACGTG	883	888	cis-acting element involved in the abscisic acid responsiveness
		ARE	AAACCA	1212	1218	cis-acting regulatory element essential for the anaerobic induction
		P-box	CCTTTTG	1871	1878	gibberellin-responsive element
		CCAAT-box	CAACGG	452	458	MYBHv1 binding site
GmRALF8	Glyma.07G198100	TGA-element	AACGAC	633	639	auxin-responsive element
		ARE	AAACCA	74	80	cis-acting regulatory element essential for the anaerobic induction
		ARE	AAACCA	703	709	cis-acting regulatory element essential for the anaerobic induction
		ARE	AAACCA	1678	1684	cis-acting regulatory element essential for the anaerobic induction
		P-box	CCTTTTG	1991	1998	gibberellin-responsive element
GmRALF9	Glyma.07G247500	TATC-box	TATCCCA	37	44	cis-acting element involved in gibberellin-responsiveness
		CGTCA-motif	CGTCA	1056	1061	cis-acting regulatory element involved in the MeJA-responsiveness
		MBS	CAACTG	1075	1081	MYB binding site involved in drought-inducibility
GmRALF10	Glyma.08G108100	ABRE	ACGTG	640	645	cis-acting element involved in the abscisic acid responsiveness
		ARE	AAACCA	211	217	cis-acting regulatory element essential for the anaerobic induction
		ARE	AAACCA	1934	1940	cis-acting regulatory element essential for the anaerobic induction
		circadian	CAAAGATATC	91	100	cis-acting regulatory element involved in circadian control
GmRALF11	Glyma.08G248700	TC-rich repeats	GTTTTCTTAC	562	571	cis-acting element involved in defense and stress responsiveness
		LTR	CCGAAA	573	579	cis-acting element involved in low-temperature responsiveness
		LTR	CCGAAA	920	926	cis-acting element involved in low-temperature responsiveness
		ABRE	ACGTG	1279	1284	cis-acting element involved in the abscisic acid responsiveness
		ARE	AAACCA	27	33	cis-acting regulatory element essential for the anaerobic induction
		ARE	AAACCA	720	726	cis-acting regulatory element essential for the anaerobic induction
		ARE	AAACCA	1058	1064	cis-acting regulatory element essential for the anaerobic induction
		ARE	AAACCA	1520	1526	cis-acting regulatory element essential for the anaerobic induction
		TGACG-motif	TGACG	820	825	cis-acting regulatory element involved in the MeJA-responsiveness
		TGACG-motif	TGACG	1337	1342	cis-acting regulatory element involved in the MeJA-responsiveness
		CGTCA-motif	CGTCA	680	685	cis-acting regulatory element involved in the MeJA-responsiveness
		MRE	AACCTAA	192	199	MYB binding site involved in light responsiveness
		CCAAT-box	CAACGG	869	875	MYBHv1 binding site
		CCAAT-box	CAACGG	1920	1926	MYBHv1 binding site
GmRALF13	Glyma.10G152000	ABRE	ACGTG	879	884	cis-acting element involved in the abscisic acid responsiveness
GmRALF14	Glyma.11G055200	TCA-element	CCATCTTTTT	984	993	cis-acting element involved in salicylic acid responsiveness
		ARE	AAACCA	1717	1723	cis-acting regulatory element essential for the anaerobic induction
		ARE	AAACCA	1902	1908	cis-acting regulatory element essential for the anaerobic induction
		CCAAT-box	CAACGG	870	876	MYBHv1 binding site
GmRALF15	Glyma.11G254600	LTR	CCGAAA	523	529	cis-acting element involved in low-temperature responsiveness
		TCA-element	CCATCTTTTT	113	122	cis-acting element involved in salicylic acid responsiveness
		TCA-element	CCATCTTTTT	800	809	cis-acting element involved in salicylic acid responsiveness
		ABRE	ACGTG	1549	1554	cis-acting element involved in the abscisic acid responsiveness
		ARE	AAACCA	1956	1962	cis-acting regulatory element essential for the anaerobic induction
		GCN4_motif	TGAGTCA	1008	1015	cis-regulatory element involved in endosperm expression
		P-box	CCTTTTG	974	981	gibberellin-responsive element
GmRALF16	Glyma.12G206100	ARE	AAACCA	1203	1209	cis-acting regulatory element essential for the anaerobic induction
		ARE	AAACCA	1934	1940	cis-acting regulatory element essential for the anaerobic induction
		TGACG-motif	TGACG	1257	1262	cis-acting regulatory element involved in the MeJA-responsiveness
		GCN4_motif	TGAGTCA	1248	1255	cis-regulatory element involved in endosperm expression
		MBS	CAACTG	49	55	MYB binding site involved in drought-inducibility
GmRALF17	Glyma.13G178300	TC-rich repeats	GTTTTCTTAC	950	959	cis-acting element involved in defense and stress responsiveness
		ABRE	ACGTG	32	37	cis-acting element involved in the abscisic acid responsiveness
		ABRE	AACCCGG	860	867	cis-acting element involved in the abscisic acid responsiveness
		ARE	AAACCA	686	692	cis-acting regulatory element essential for the anaerobic induction
		P-box	CCTTTTG	1991	1998	gibberellin-responsive element
GmRALF18	Glyma.13G294734	TCA-element	CCATCTTTTT	410	419	cis-acting element involved in salicylic acid responsiveness
		TCA-element	CCATCTTTTT	441	450	cis-acting element involved in salicylic acid responsiveness
		ABRE	ACGTG	1492	1497	cis-acting element involved in the abscisic acid responsiveness
		ARE	AAACCA	1900	1906	cis-acting regulatory element essential for the anaerobic induction
		circadian	CAAAGATATC	1354	1363	cis-acting regulatory element involved in circadian control
		MRE	AACCTAA	1158	1165	MYB binding site involved in light responsiveness
GmRALF19	Glyma.15G075300	ARE	AAACCA	1415	1421	cis-acting regulatory element essential for the anaerobic induction
		ARE	AAACCA	1580	1586	cis-acting regulatory element essential for the anaerobic induction
		ARE	AAACCA	1730	1736	cis-acting regulatory element essential for the anaerobic induction
		CAT-box	GCCACT	1565	1571	cis-acting regulatory element related to meristem expression
		MBS	CAACTG	1448	1454	MYB binding site involved in drought-inducibility
		MRE	AACCTAA	1971	1978	MYB binding site involved in light responsiveness
GmRALF20	Glyma.16G090600	ABRE	ACGTG	956	961	cis-acting element involved in the abscisic acid responsiveness
		ARE	AAACCA	1316	1322	cis-acting regulatory element essential for the anaerobic induction
		CGTCA-motif	CGTCA	1415	1420	cis-acting regulatory element involved in the MeJA-responsiveness
		MRE	AACCTAA	1859	1866	MYB binding site involved in light responsiveness
GmRALF21	Glyma.17G026400	TATC-box	TATCCCA	585	592	cis-acting element involved in gibberellin-responsiveness
		LTR	CCGAAA	1131	1137	cis-acting element involved in low-temperature responsiveness
		TGACG-motif	TGACG	1270	1275	cis-acting regulatory element involved in the MeJA-responsiveness
		MBS	CAACTG	1291	1297	MYB binding site involved in drought-inducibility
GmRALF22	Glyma.18G002500	LTR	CCGAAA	816	822	cis-acting element involved in low-temperature responsiveness
		ARE	AAACCA	1944	1950	cis-acting regulatory element essential for the anaerobic induction
		CAT-box	GCCACT	330	336	cis-acting regulatory element related to meristem expression
		GCN4_motif	TGAGTCA	1328	1335	cis-regulatory element involved in endosperm expression
GmRALF23	Glyma.18G175401	TC-rich repeats	GTTTTCTTAC	520	529	cis-acting element involved in defense and stress responsiveness
		ARE	AAACCA	1389	1395	cis-acting regulatory element essential for the anaerobic induction
GmRALF24	Glyma.19G209900	TCA-element	TCAGAAGAGG	1378	1387	cis-acting element involved in salicylic acid responsiveness
		CGTCA-motif	CGTCA	298	303	cis-acting regulatory element involved in the MeJA-responsiveness
		GCN4_motif	TGAGTCA	1766	1773	cis-regulatory element involved in endosperm expression
		GARE-motif	TCTGTTG	579	586	gibberellin-responsive element
		CCAAT-box	CAACGG	1410	1416	MYBHv1 binding site
GmRALF25	Glyma.19G233700	ARE	AAACCA	1464	1470	cis-acting regulatory element essential for the anaerobic induction
		ARE	AAACCA	1954	1960	cis-acting regulatory element essential for the anaerobic induction
		CGTCA-motif	CGTCA	583	588	cis-acting regulatory element involved in the MeJA-responsiveness
GmRALF26	Glyma.20G066000	AuxRR-core	GGTCCAT	259	266	cis-acting regulatory element involved in auxin responsiveness
		MRE	AACCTAA	1036	1043	MYB binding site involved in light responsiveness
GmRALF27	Glyma.20G236400	TGA-element	AACGAC	168	174	auxin-responsive element
		ABRE	ACGTG	1052	1057	cis-acting element involved in the abscisic acid responsiveness
		ARE	AAACCA	45	51	cis-acting regulatory element essential for the anaerobic induction
		TGACG-motif	TGACG	455	460	cis-acting regulatory element involved in the MeJA-responsiveness
		TGACG-motif	TGACG	935	940	cis-acting regulatory element involved in the MeJA-responsiveness
		MBS	CAACTG	180	186	MYB binding site involved in drought-inducibility
RALF1	AT1G02900	LTR	CCGAAA	1631	1637	cis-acting element involved in low-temperature responsiveness
		ABRE	AACCCGG	343	350	cis-acting element involved in the abscisic acid responsiveness
		CGTCA-motif	CGTCA	860	865	cis-acting regulatory element involved in the MeJA-responsiveness
		TGACG-motif	TGACG	562	567	cis-acting regulatory element involved in the MeJA-responsiveness
RALF2	AT1G23145	ABRE	CACGTG	880	886	cis-acting element involved in the abscisic acid responsiveness
		ABRE	ACGTG	881	886	cis-acting element involved in the abscisic acid responsiveness
		ARE	AAACCA	741	747	cis-acting regulatory element essential for the anaerobic induction
		CGTCA-motif	CGTCA	836	841	cis-acting regulatory element involved in the MeJA-responsiveness
		CAT-box	GCCACT	1518	1524	cis-acting regulatory element related to meristem expression
RALF3	AT1G23147	ABRE	ACGTG	132	137	cis-acting element involved in the abscisic acid responsiveness
		ABRE	CACGTG	143	149	cis-acting element involved in the abscisic acid responsiveness
		ABRE	ACGTG	144	149	cis-acting element involved in the abscisic acid responsiveness
		ABRE	ACGTG	231	236	cis-acting element involved in the abscisic acid responsiveness
		ABRE	ACGTG	1402	1407	cis-acting element involved in the abscisic acid responsiveness
		CGTCA-motif	CGTCA	991	996	cis-acting regulatory element involved in the MeJA-responsiveness
		TGACG-motif	TGACG	882	887	cis-acting regulatory element involved in the MeJA-responsiveness
		GCN4_motif	TGAGTCA	532	539	cis-regulatory element involved in endosperm expression
		P-box	CCTTTTG	1763	1770	gibberellin-responsive element
		MRE	AACCTAA	1501	1508	MYB binding site involved in light responsiveness
RALF4	AT1G28270	TGA-element	AACGAC	1786	1792	auxin-responsive element
		TC-rich repeats	GTTTTCTTAC	977	986	cis-acting element involved in defense and stress responsiveness
		TATC-box	TATCCCA	146	153	cis-acting element involved in gibberellin-responsiveness
		ABRE	ACGTG	937	942	cis-acting element involved in the abscisic acid responsiveness
		ABRE	ACGTG	1271	1276	cis-acting element involved in the abscisic acid responsiveness
		ARE	AAACCA	692	698	cis-acting regulatory element essential for the anaerobic induction
		ARE	AAACCA	1850	1856	cis-acting regulatory element essential for the anaerobic induction
		ARE	AAACCA	1976	1982	cis-acting regulatory element essential for the anaerobic induction
		ARE	AAACCA	1982	1988	cis-acting regulatory element essential for the anaerobic induction
		circadian	CAAAGATATC	920	929	cis-acting regulatory element involved in circadian control
		MBS	CAACTG	1819	1825	MYB binding site involved in drought-inducibility
		MRE	AACCTAA	1942	1949	MYB binding site involved in light responsiveness
RALF5	AT1G35467	TGA-element	AACGAC	428	434	auxin-responsive element
		TGA-element	AACGAC	563	569	auxin-responsive element
		TGA-element	AACGAC	1798	1804	auxin-responsive element
		LTR	CCGAAA	1681	1687	cis-acting element involved in low-temperature responsiveness
		TCA-element	CCATCTTTTT	1105	1114	cis-acting element involved in salicylic acid responsiveness
		ABRE	ACGTG	540	545	cis-acting element involved in the abscisic acid responsiveness
		ABRE	GCAACGTGTC	1193	1202	cis-acting element involved in the abscisic acid responsiveness
		ABRE	ACGTG	1196	1201	cis-acting element involved in the abscisic acid responsiveness
		ARE	AAACCA	949	955	cis-acting regulatory element essential for the anaerobic induction
		ARE	AAACCA	1090	1096	cis-acting regulatory element essential for the anaerobic induction
		ARE	AAACCA	1294	1300	cis-acting regulatory element essential for the anaerobic induction
		ARE	AAACCA	1479	1485	cis-acting regulatory element essential for the anaerobic induction
		ARE	AAACCA	1672	1678	cis-acting regulatory element essential for the anaerobic induction
		ARE	AAACCA	1791	1797	cis-acting regulatory element essential for the anaerobic induction
		CGTCA-motif	CGTCA	460	465	cis-acting regulatory element involved in the MeJA-responsiveness
		CGTCA-motif	CGTCA	1712	1717	cis-acting regulatory element involved in the MeJA-responsiveness
		TGACG-motif	TGACG	538	543	cis-acting regulatory element involved in the MeJA-responsiveness
		TGACG-motif	TGACG	1337	1342	cis-acting regulatory element involved in the MeJA-responsiveness
		CAT-box	GCCACT	359	365	cis-acting regulatory element related to meristem expression
		P-box	CCTTTTG	35	42	gibberellin-responsive element
		CCAAT-box	CAACGG	1044	1050	MYBHv1 binding site
RALF6	AT1G60625	TGA-element	AACGAC	1706	1712	auxin-responsive element
		LTR	CCGAAA	1787	1793	cis-acting element involved in low-temperature responsiveness
		TCA-element	CCATCTTTTT	1853	1862	cis-acting element involved in salicylic acid responsiveness
		ABRE	ACGTG	1124	1129	cis-acting element involved in the abscisic acid responsiveness
		ABRE	CGTACGTGCA	1620	1629	cis-acting element involved in the abscisic acid responsiveness
		ARE	AAACCA	1767	1773	cis-acting regulatory element essential for the anaerobic induction
		circadian	CAAAGATATC	587	596	cis-acting regulatory element involved in circadian control
		CCAAT-box	CAACGG	785	791	MYBHv1 binding site
RALF7	AT1G60815	TCA-element	CCATCTTTTT	1863	1873	cis-acting element involved in salicylic acid responsiveness
		ARE	AAACCA	97	103	cis-acting regulatory element essential for the anaerobic induction
		ARE	AAACCA	874	880	cis-acting regulatory element essential for the anaerobic induction
		AuxRR-core	GGTCCAT	1242	1249	cis-acting regulatory element involved in auxin responsiveness
		AuxRR-core	GGTCCAT	1363	1370	cis-acting regulatory element involved in auxin responsiveness
		GCN4_motif	TGAGTCA	232	239	cis-regulatory element involved in endosperm expression
		GCN4_motif	TGAGTCA	1369	1376	cis-regulatory element involved in endosperm expression
RALF8	AT1G61563	ARE	AAACCA	562	568	cis-acting regulatory element essential for the anaerobic induction
		circadian	CAAAGATATC	1274	1283	cis-acting regulatory element involved in circadian control
		CAT-box	GCCACT	1085	1091	cis-acting regulatory element related to meristem expression
RALF9	AT1G61566	ABRE	ACGTG	829	834	cis-acting element involved in the abscisic acid responsiveness
		ARE	AAACCA	1665	1671	cis-acting regulatory element essential for the anaerobic induction
		CGTCA-motif	CGTCA	1422	1427	cis-acting regulatory element involved in the MeJA-responsiveness
		CGTCA-motif	CGTCA	1732	1737	cis-acting regulatory element involved in the MeJA-responsiveness
		P-box	CCTTTTG	1001	1008	gibberellin-responsive element
RALF10	AT2G19020	TGA-element	AACGAC	355	361	auxin-responsive element
		ABRE	AACCCGG	985	992	cis-acting element involved in the abscisic acid responsiveness
		ARE	AAACCA	1011	1017	cis-acting regulatory element essential for the anaerobic induction
		CGTCA-motif	CGTCA	1732	1737	cis-acting regulatory element involved in the MeJA-responsiveness
		TGACG-motif	TGACG	664	669	cis-acting regulatory element involved in the MeJA-responsiveness
		TGACG-motif	TGACG	724	729	cis-acting regulatory element involved in the MeJA-responsiveness
		CAT-box	GCCACT	1075	1081	cis-acting regulatory element related to meristem expression
RALF11	AT2G19030	TCA-element	CCATCTTTTT	1925	1934	cis-acting element involved in salicylic acid responsiveness
		ABRE	ACGTG	619	624	cis-acting element involved in the abscisic acid responsiveness
		ARE	AAACCA	1585	1591	cis-acting regulatory element essential for the anaerobic induction
		circadian	CAAAGATATC	820	829	cis-acting regulatory element involved in circadian control
		CGTCA-motif	CGTCA	169	174	cis-acting regulatory element involved in the MeJA-responsiveness
		TGACG-motif	TGACG	666	671	cis-acting regulatory element involved in the MeJA-responsiveness
		MRE	AACCTAA	1824	1831	MYB binding site involved in light responsiveness
RALF12	AT2G19040	MRE	AACCTAA	1823	1830	MYB binding site involved in light responsiveness
RALF13	AT2G19045	TCA-element	CCATCTTTTT	1920	1929	cis-acting element involved in salicylic acid responsiveness
		circadian	CAAAGATATC	628	638	cis-acting regulatory element involved in circadian control
		TGACG-motif	TGACG	1146	1151	cis-acting regulatory element involved in the MeJA-responsiveness
		MRE	AACCTAA	72	79	MYB binding site involved in light responsiveness
		MRE	AACCTAA	1817	1824	MYB binding site involved in light responsiveness
RALF14	AT2G20660	TGA-element	AACGAC	1918	1924	auxin-responsive element
		TCA-element	CCATCTTTTT	1318	1327	cis-acting element involved in salicylic acid responsiveness
		ABRE	ACGTG	1922	1927	cis-acting element involved in the abscisic acid responsiveness
		ARE	AAACCA	293	299	cis-acting regulatory element essential for the anaerobic induction
		MRE	AACCTAA	1937	1944	MYB binding site involved in light responsiveness
RALF15	AT2G22055	TATC-box	TATCCCA	840	847	cis-acting element involved in gibberellin-responsiveness
		TCA-element	TCAGAAGAGG	280	289	cis-acting element involved in salicylic acid responsiveness
		ABRE	ACGTG	511	516	cis-acting element involved in the abscisic acid responsiveness
		CGTCA-motif	CGTCA	1324	1329	cis-acting regulatory element involved in the MeJA-responsiveness
		TGACG-motif	TGACG	917	922	cis-acting regulatory element involved in the MeJA-responsiveness
RALF16	AT2G32835	TGA-element	AACGAC	1130	1136	auxin-responsive element
		CGTCA-motif	CGTCA	481	486	cis-acting regulatory element involved in the MeJA-responsiveness
RALF17	AT2G32890	ARE	AAACCA	1211	1217	cis-acting regulatory element essential for the anaerobic induction
		CGTCA-motif	CGTCA	929	934	cis-acting regulatory element involved in the MeJA-responsiveness
		CGTCA-motif	CGTCA	1235	1240	cis-acting regulatory element involved in the MeJA-responsiveness
		TGACG-motif	TGACG	1484	1489	cis-acting regulatory element involved in the MeJA-responsiveness
		TGACG-motif	TGACG	1560	1565	cis-acting regulatory element involved in the MeJA-responsiveness
		GCN4_motif	TGAGTCA	539	546	cis-regulatory element involved in endosperm expression
RALF18	AT2G33130	LTR	CCGAAA	1	7	cis-acting element involved in low-temperature responsiveness
		TCA-element	CCATCTTTTT	310	319	cis-acting element involved in salicylic acid responsiveness
		TCA-element	CCATCTTTTT	1775	1784	cis-acting element involved in salicylic acid responsiveness
		ABRE	ACGTG	53	58	cis-acting element involved in the abscisic acid responsiveness
		ARE	AAACCA	498	504	cis-acting regulatory element essential for the anaerobic induction
		ARE	AAACCA	1933	1939	cis-acting regulatory element essential for the anaerobic induction
		TGACG-motif	TGACG	1818	1823	cis-acting regulatory element involved in the MeJA-responsiveness
		P-box	CCTTTTG	1338	1345	gibberellin-responsive element
		CCAAT-box	CAACGG	403	409	MYBHv1 binding site
RALF19	AT2G33775	TGA-element	AACGAC	1725	1731	auxin-responsive element
		LTR	CCGAAA	1350	1356	cis-acting element involved in low-temperature responsiveness
		ABRE	ACGTG	1729	1734	cis-acting element involved in the abscisic acid responsiveness
		ARE	AAACCA	1993	1999	cis-acting regulatory element essential for the anaerobic induction
		TGACG-motif	TGACG	377	382	cis-acting regulatory element involved in the MeJA-responsiveness
RALF20	AT2G34825	TC-rich repeats	ATTCTCTAAC	872	881	cis-acting element involved in defense and stress responsiveness
		TC-rich repeats	GTTTTCTTAC	955	964	cis-acting element involved in defense and stress responsiveness
		TC-rich repeats	GTTTTCTTAC	1397	1406	cis-acting element involved in defense and stress responsiveness
		TCA-element	CCATCTTTTT	1804	1813	cis-acting element involved in salicylic acid responsiveness
		ARE	AAACCA	556	562	cis-acting regulatory element essential for the anaerobic induction
		ARE	AAACCA	1113	1119	cis-acting regulatory element essential for the anaerobic induction
		MBS	CAACTG	347	353	MYB binding site involved in drought-inducibility
		MBS	CAACTG	878	884	MYB binding site involved in drought-inducibility
		MBS	CAACTG	1104	1110	MYB binding site involved in drought-inducibility
RALF21	AT3G04735	ARE	AAACCA	363	369	cis-acting regulatory element essential for the anaerobic induction
		GARE-motif	TCTGTTG	667	674	gibberellin-responsive element
		MRE	AACCTAA	1619	1626	MYB binding site involved in light responsiveness
RALF22	AT3G05490	ABRE	ACGTG	1224	1229	cis-acting element involved in the abscisic acid responsiveness
		TGACG-motif	TGACG	636	641	cis-acting regulatory element involved in the MeJA-responsiveness
		TGACG-motif	TGACG	1232	1237	cis-acting regulatory element involved in the MeJA-responsiveness
		MRE	AACCTAA	1576	1583	MYB binding site involved in light responsiveness
RALF23	AT3G16570	ABRE	ACGTG	9	14	cis-acting element involved in the abscisic acid responsiveness
		ARE	AAACCA	1065	1071	cis-acting regulatory element essential for the anaerobic induction
		CAT-box	GCCACT	1824	1830	cis-acting regulatory element related to meristem expression
		MRE	AACCTAA	362	369	MYB binding site involved in light responsiveness
		MRE	AACCTAA	390	397	MYB binding site involved in light responsiveness
RALF24	AT3G23805	GARE-motif	TCTGTTG	1886	1893	gibberellin-responsive element
RALF25	AT3G25165	LTR	CCGAAA	1800	1806	cis-acting element involved in low-temperature responsiveness
		TCA-element	CCATCTTTTT	567	576	cis-acting element involved in salicylic acid responsiveness
		ABRE	CGCACGTGTC	833	842	cis-acting element involved in the abscisic acid responsiveness
		ABRE	TACGTGTC	835	843	cis-acting element involved in the abscisic acid responsiveness
		ABRE	ACGTG	836	841	cis-acting element involved in the abscisic acid responsiveness
		ARE	AAACCA	179	185	cis-acting regulatory element essential for the anaerobic induction
		ARE	AAACCA	1005	1011	cis-acting regulatory element essential for the anaerobic induction
		CGTCA-motif	CGTCA	361	366	cis-acting regulatory element involved in the MeJA-responsiveness
		TGACG-motif	TGACG	1053	1058	cis-acting regulatory element involved in the MeJA-responsiveness
		CAT-box	GCCACT	1513	1519	cis-acting regulatory element related to meristem expression
		GARE-motif	TCTGTTG	1241	1248	gibberellin-responsive element
RALF26	AT3G25170	ABRE	CACGTG	371	377	cis-acting element involved in the abscisic acid responsiveness
		ABRE	ACGTG	372	377	cis-acting element involved in the abscisic acid responsiveness
		ABRE	AACCCGG	703	710	cis-acting element involved in the abscisic acid responsiveness
		ARE	AAACCA	761	767	cis-acting regulatory element essential for the anaerobic induction
		ARE	AAACCA	1071	1077	cis-acting regulatory element essential for the anaerobic induction
		circadian	CAAAGATATC	1656	1665	cis-acting regulatory element involved in circadian control
		CGTCA-motif	CGTCA	1725	1730	cis-acting regulatory element involved in the MeJA-responsiveness
		GCN4_motif	TGAGTCA	1603	1610	cis-regulatory element involved in endosperm expression
RALF27	AT3G29780	TC-rich repeats	ATTCTCTAAC	764	773	cis-acting element involved in defense and stress responsiveness
		ARE	AAACCA	397	403	cis-acting regulatory element essential for the anaerobic induction
		ARE	AAACCA	614	620	cis-acting regulatory element essential for the anaerobic induction
		ARE	AAACCA	1870	1876	cis-acting regulatory element essential for the anaerobic induction
		MBS	CAACTG	477	483	MYB binding site involved in drought-inducibility
RALF28	AT4G11510	ABRE	ACGTG	1201	1206	cis-acting element involved in the abscisic acid responsiveness
		ABRE	ACGTG	1567	1572	cis-acting element involved in the abscisic acid responsiveness
		ABRE	ACGTG	1580	1585	cis-acting element involved in the abscisic acid responsiveness
		ARE	AAACCA	927	933	cis-acting regulatory element essential for the anaerobic induction
		ARE	AAACCA	1600	1606	cis-acting regulatory element essential for the anaerobic induction
		circadian	CAAAGATATC	1738	1747	cis-acting regulatory element involved in circadian control
		GCN4_motif	TGAGTCA	879	886	cis-regulatory element involved in endosperm expression
		GARE-motif	TCTGTTG	406	413	gibberellin-responsive element
		MBS	CAACTG	371	377	MYB binding site involved in drought-inducibility
RALF29	AT4G11653	LTR	CCGAAA	899	905	cis-acting element involved in low-temperature responsiveness
		ABRE	ACGTG	746	751	cis-acting element involved in the abscisic acid responsiveness
		ARE	AAACCA	1281	1287	cis-acting regulatory element essential for the anaerobic induction
		ARE	AAACCA	1732	1738	cis-acting regulatory element essential for the anaerobic induction
		AuxRR-core	GGTCCAT	725	732	cis-acting regulatory element involved in auxin responsiveness
		circadian	CAAAGATATC	1890	1899	cis-acting regulatory element involved in circadian control
		CGTCA-motif	CGTCA	1532	1537	cis-acting regulatory element involved in the MeJA-responsiveness
		TGACG-motif	TGACG	646	651	cis-acting regulatory element involved in the MeJA-responsiveness
		TGACG-motif	TGACG	697	702	cis-acting regulatory element involved in the MeJA-responsiveness
		GARE-motif	TCTGTTG	681	688	gibberellin-responsive element
RALF30	AT4G13075	LTR	CCGAAA	1577	1583	cis-acting element involved in low-temperature responsiveness
		ABRE	ACGTG	1040	1045	cis-acting element involved in the abscisic acid responsiveness
		CGTCA-motif	CGTCA	345	350	cis-acting regulatory element involved in the MeJA-responsiveness
		CGTCA-motif	CGTCA	664	669	cis-acting regulatory element involved in the MeJA-responsiveness
		CGTCA-motif	CGTCA	1616	1621	cis-acting regulatory element involved in the MeJA-responsiveness
		MBS	CAACTG	496	502	MYB binding site involved in drought-inducibility
RALF31	AT4G13950	ARE	AAACCA	168	174	cis-acting regulatory element essential for the anaerobic induction
		ARE	AAACCA	1353	1359	cis-acting regulatory element essential for the anaerobic induction
		ARE	AAACCA	1850	1856	cis-acting regulatory element essential for the anaerobic induction
		MRE	AACCTAA	1857	1864	MYB binding site involved in light responsiveness
RALF32	AT4G14010	ABRE	GCAACGTGTC	87	96	cis-acting element involved in the abscisic acid responsiveness
		ABRE	ACGTG	90	95	cis-acting element involved in the abscisic acid responsiveness
		ABRE	ACGTG	1088	1093	cis-acting element involved in the abscisic acid responsiveness
		ABRE	ACGTG	1632	1637	cis-acting element involved in the abscisic acid responsiveness
		ARE	AAACCA	354	360	cis-acting regulatory element essential for the anaerobic induction
		CGTCA-motif	CGTCA	433	438	cis-acting regulatory element involved in the MeJA-responsiveness
		TGACG-motif	TGACG	515	520	cis-acting regulatory element involved in the MeJA-responsiveness
		P-box	CCTTTTG	1666	1673	gibberellin-responsive element
		MBS	CAACTG	576	582	MYB binding site involved in drought-inducibility
RALF33	AT4G15800	ARE	AAACCA	493	499	cis-acting regulatory element essential for the anaerobic induction
		ARE	AAACCA	1432	1438	cis-acting regulatory element essential for the anaerobic induction
		ARE	AAACCA	1467	1473	cis-acting regulatory element essential for the anaerobic induction
		ARE	AAACCA	1918	1924	cis-acting regulatory element essential for the anaerobic induction
		CGTCA-motif	CGTCA	1743	1748	cis-acting regulatory element involved in the MeJA-responsiveness
		CAT-box	GCCACT	1189	1195	cis-acting regulatory element related to meristem expression
		GARE-motif	TCTGTTG	474	481	gibberellin-responsive element
RALF34	AT5G67070	ARE	AAACCA	1679	1685	cis-acting regulatory element essential for the anaerobic induction
		AuxRR-core	GGTCCAT	1850	1857	cis-acting regulatory element involved in auxin responsiveness
		CGTCA-motif	CGTCA	530	535	cis-acting regulatory element involved in the MeJA-responsiveness
		CGTCA-motif	CGTCA	1796	1801	cis-acting regulatory element involved in the MeJA-responsiveness
		TGACG-motif	TGACG	778	783	cis-acting regulatory element involved in the MeJA-responsiveness
		MBS	CAACTG	1475	1481	MYB binding site involved in drought-inducibility
		MBS	CAACTG	1584	1590	MYB binding site involved in drought-inducibility
		MBS	CAACTG	1895	1901	MYB binding site involved in drought-inducibility
		CCAAT-box	CAACGG	609	615	MYBHv1 binding site
